# Supplementary figures and images for: Shaoyao-Gancao Decoction alleviated hyperandrogenism in a letrozole-induced rat model of polycystic ovary syndrome by inhibition of NF-κB activation
Source: Oxford University Press journal article supplement (doi:10.1042/bsr20181877), 2018-12-20

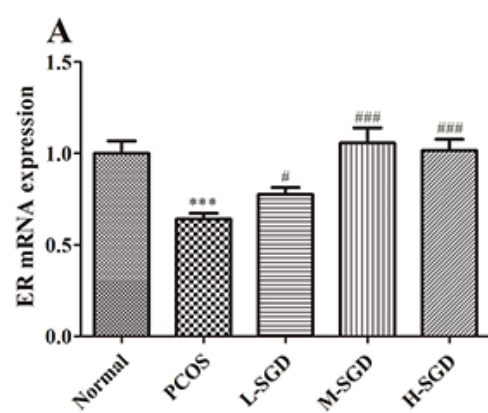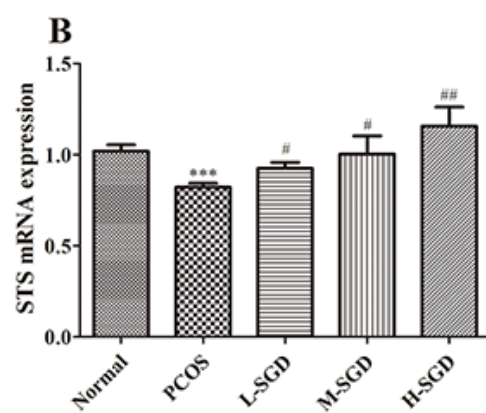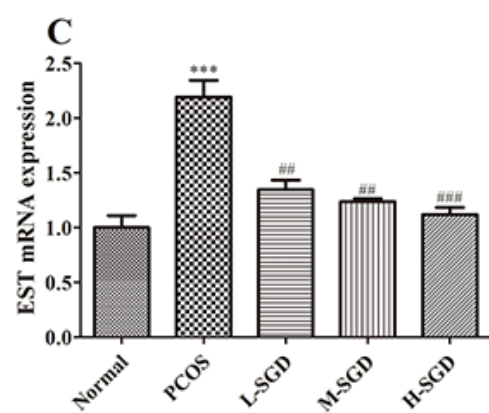

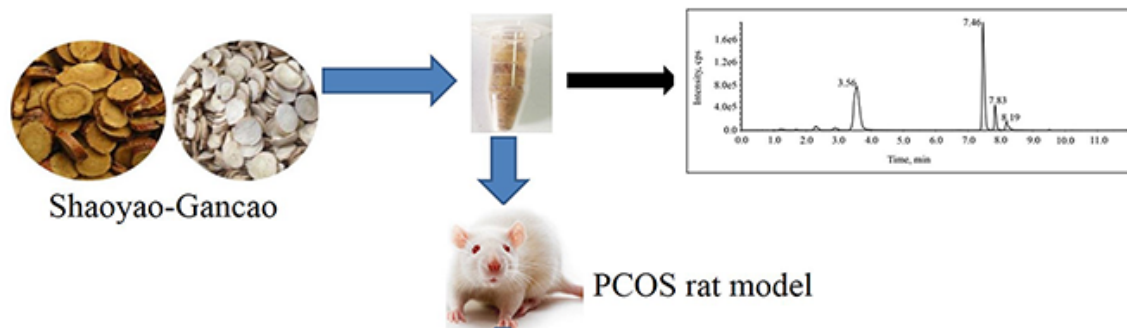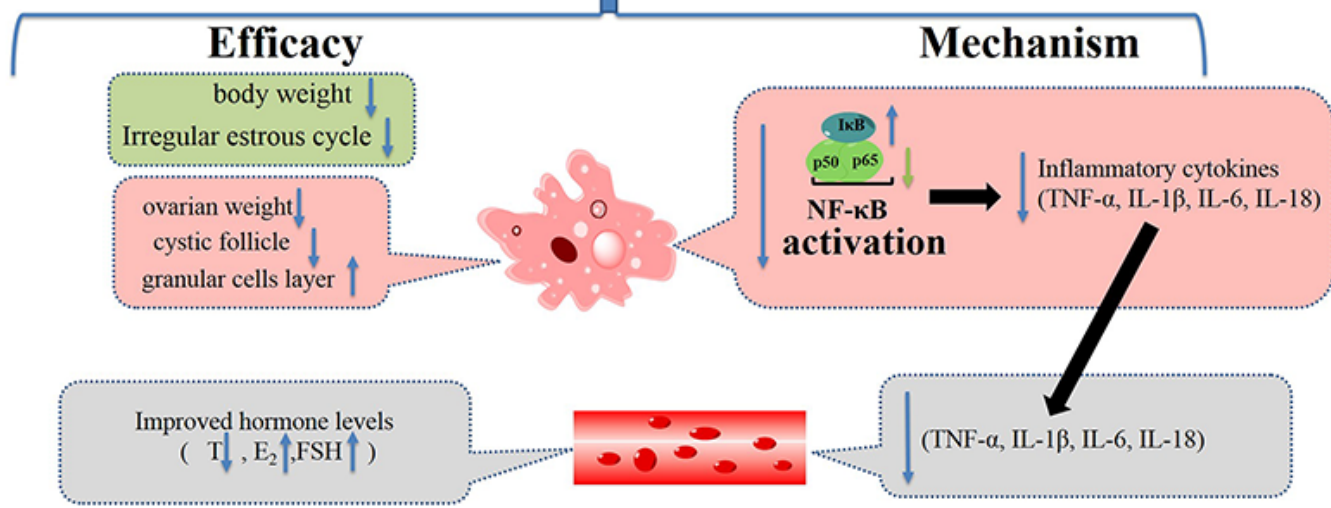

Supplement: bsr-2018-1877_supp.pdf [file bsr-2018-1877_supp.pdf]
